1   **Title:**

2

3   Phylogenetic analysis supports a link between DUF1220 domain number and primate  
4   brain expansion

5

6   **Authors:**

7   Fabian Zimmer

8   Stephen H. Montgomery\*

9

10   **Affiliations:**

11   Dept. Genetics, Evolution & Environment, University College London, Gower Street,  
12   London, UK, WC1E 6BT

13

14   **\*Corresponding author**

15   Email: [Stephen.Montgomery@cantab.net](mailto:Stephen.Montgomery@cantab.net)

16

17   **Key words:** Autistic Spectrum Disorders, DUF1220 domains, NBPF, primate brain  
18   evolution.

19

20

21

22

23

24

25

26

27

28

29

30

31

32

33

34

## 35 Abstract

36 The expansion of DUF1220 domain copy number during human evolution is a  
 37 dramatic example of rapid and repeated domain duplication. However, the phenotypic  
 38 relevance of DUF1220 dosage is unknown. Although patterns of expression,  
 39 homology and disease associations suggest a role in cortical development, this  
 40 hypothesis has not been robustly tested using phylogenetic methods. Here, we  
 41 estimate DUF1220 domain counts across 12 primate genomes using a nucleotide  
 42 Hidden Markov Model. We then test a series of hypotheses designed to examine the  
 43 potential evolutionary significance of DUF1220 copy number expansion. Our results  
 44 suggest a robust association with brain size, and more specifically neocortex volume.  
 45 In contradiction to previous hypotheses we find a strong association with postnatal  
 46 brain development, but not with prenatal brain development. Our results provide  
 47 further evidence of a conserved association between specific loci and brain size across  
 48 primates, suggesting human brain evolution occurred through a continuation of  
 49 existing processes.

50

51

52

53

54

55

56

57

58

59

60

61

62

63

64

65

66

67

68

## 69 Introduction

70 The molecular targets of selection favoring brain expansion during human evolution  
71 have been sought by identifying dramatic, lineage-specific shifts in evolutionary rate.  
72 The increase in DUF1220 domains during human evolution provides one of the most  
73 dramatic increases in copy number (Popesco et al., 2006; Dumas et al., 2012). A  
74 single copy of this protein domain is found in *PDE4DIP* in most mammalian  
75 genomes. In primates, this ancestral domain has been duplicated many times over,  
76 reaching its peak abundance in humans where several hundred DUF1220 domains  
77 exist across 20-30 genes in the Nuclear Blastoma Breakpoint Family (NBPF)  
78 (Vandepoele et al., 2005; Dumas et al., 2012). The majority of these map to 1q21.1, a  
79 chromosomal region with complex, and unstable genomic architecture (O'Bleness et  
80 al., 2012, 2014).

81 Interspecific DUF1220 counts show a pattern of phylogenetic decay with  
82 increasing distance from humans (Popesco et al., 2006; Dumas and Sikela, 2009;  
83 Dumas et al., 2012). In humans, DUF1220 dosage has also been linked to head  
84 circumference (Dumas et al., 2012), and severe neurodevelopmental disorders,  
85 including autism spectrum disorders (ASD) and microcephaly (Dumas et al., 2012;  
86 Davis et al., 2014). The severity of ASD impairments is also correlated with 1q21.1  
87 DUF1220 copy number suggesting a dosage effect (Davis et al., 2014). Taken  
88 together, these observations led to the suggestion that the expansion of DUF1220  
89 copy number played a primary role in human brain evolution (Dumas and Sikela,  
90 2009; Keeney et al., 2014a).

91 The strength of this hypothesis is difficult to assess given the paucity of  
92 information on the developmental function of NBPF genes and the DUF1220 domain.  
93 DUF1220 domains are highly expressed during periods of cortical neurogenesis,  
94 suggesting a potential role in prolonging the proliferation of neural progenitors by  
95 regulating centriole and microtubule dynamics to control key cell fate switches  
96 critical for neurogenesis (Keeney et al., 2014b). *PDE4DIP*, which contains the  
97 ancestral DUF1220 domain, does indeed associate with the spindle poles (Popesco et  
98 al., 2006) and is homologous to *CDK5RAP2*, a centrosomal protein essential for  
99 neural proliferation (Bond et al., 2005; Buchman et al., 2010), which co-evolved with  
100 brain mass across primates (Montgomery et al., 2011).

101 Two previous analyses reported a significant association between DUF1220  
102 copy number and brain mass, cortical neuron number (Dumas et al., 2012), cortical

gray and white matter, surface area and gyrification (Keeney et al., 2014b). However, several limitations in these analyses restrict confidence in the results. First, DUF1220 copy number was assessed across species using a BLAT/BLAST analysis with a query sequence from humans, which introduces a bias that may partly explain the observed phylogenetic decay. Second, counts were not restricted to those domains occurring in functional exonic sequence. Finally, the analyses were limited to a small number of species (4-8 primates), and did not correct for phylogenetic non-independence (Felsenstein, 1985) or autocorrelation between traits.

Here, we use nucleotide Hidden Markov Models (HMMER3; Eddy, 2011) to more accurately query the DUF1220 domain number of distantly related genomes. After filtering these counts to limit the analysis to exonic sequence, we use phylogenetic comparative methods that correct for non-independence to test whether DUF1220 copy number is robustly associated with brain size, whether this is due to an association with pre- or postnatal brain development, and whether the association is specific to the neocortex.

## Results

We find evidence that CM-associated exonic DUF1220 counts (Table 1) are associated with brain mass across primates ( $n = 12$ , posterior mean = 1.927, 95% CI = 0.800-3.040,  $p_{\text{MCMC}} = 0.001$ ). This association is robust to the exclusion of *Homo* (posterior mean = 1.271, 95% CI = 0.490-2.019,  $p_{\text{MCMC}} = 0.003$ ), and found when hominoids ( $n = 5$ , posterior mean = 3.679, 95% CI = 0.966-6.258,  $p_{\text{MCMC}} = 0.018$ ) or anthropoids ( $n = 9$ , posterior mean = 2.019, 95% CI = 0.352-3.684,  $p_{\text{MCMC}} = 0.010$ ) are analyzed alone, suggesting a consistent phylogenetic association. When body mass is included as a co-factor in the model, the positive association is restricted to brain mass (Table 2a).

Separation of pre- and postnatal development specifically links DUF1220 number to postnatal brain growth. Analysed separately, the association with prenatal brain growth is weaker ( $n = 11$ , posterior mean = 1.758, 95% CI = -0.039-3.543,  $p_{\text{MCMC}} = 0.023$ ) than with postnatal brain growth (posterior mean = 1.839, 95% CI = 0.895-2.808,  $p_{\text{MCMC}} = 0.001$ ). If both traits are included in the same model, only the positive association with postnatal brain growth remains (Table 2b). Multiple

136 regression analysis also confirms the association is specific to postnatal brain growth,  
137 rather than postnatal body growth (Table 2b).

138 Finally, we examined the hypothesized relationship with neocortex volume  
139 (e.g. Keeney et al., 2014a,b), but also consider cerebellum volume, as this region co-  
140 evolves with the neocortex (Barton and Harvey, 2000), has expanded in apes (Barton  
141 and Venditti, 2014), and shows high levels of NBPF expression (Popesco et al.,  
142 2006). When the rest-of-the-brain (RoB) is included as a co-factor, to account for  
143 variation in overall brain size, a positive association is found for neocortex volume  
144 but not cerebellum volume (Table 2c).

145

## 146 **Discussion**

147 Our phylogenetic analyses support the hypothesis that the increase in DUF1220  
148 number co-evolves with brain mass, and contributes to the proximate basis of primate  
149 brain evolution. We also find evidence of specific associations with neocortex volume  
150 and postnatal brain growth. Previous hypotheses concerning the phenotypic relevance  
151 of DUF1220 domain number have focused on their possible contribution to  
152 neurogenesis (Dumas and Sikela, 2009; Keeney et al., 2014a; b). This is supported by  
153 homology to genes with known functions in cell cycle dynamics (Popesco et al.,  
154 2006; Thornton and Woods, 2009), relevant spatial and temporal expression patterns  
155 (Keeney et al., 2014b), and an effect on the proliferation of neuroblastoma cell  
156 cultures (Vandepoele et al., 2008). However, a direct effect of variation in DUF1220  
157 domain number on neural proliferation has not been demonstrated (Keeney et al.,  
158 2015).

159 If DUF1220 domains do regulate neurogenesis, we would expect them to co-  
160 evolve with prenatal brain growth, as cortical neurogenesis is restricted to prenatal  
161 development (Bhardwaj et al., 2006). Our results instead suggest a robust and specific  
162 relationship with postnatal brain development. Existing data on DUF1220 domain  
163 function suggest two potential roles that may explain this association: i) a contribution  
164 to axonogenesis via initiating and stabilizing microtubule growth in dendrites; and ii)  
165 a potential role in apoptosis during brain maturation. Both hypotheses are consistent  
166 with the reported association between variation in DUF1220 dosage and ASD (Davis  
167 et al., 2014). Indeed, an emphasis on postnatal brain growth is potentially more  
168 relevant for ASD, which develops postnatal, accompanied by a period of accelerated  
169 brain growth (Courchesne et al., 2001).

170 Microtubule assembly is essential for dendritic growth and axonogenesis  
 171 (Conde and Cáceres, 2009). *PDE4DIP*, which contains the ancestral DUF1220  
 172 domain, has known functions in microtubule nucleation, growth, and cell migration  
 173 (Roubin et al., 2013). There is also evidence NBPf1 interacts with a key regulator of  
 174 Wnt signaling (Vandepoele et al., 2010), which has important roles in neuronal  
 175 differentiation, dendritic growth and plasticity (Inestrosa and Varela-Nallar, 2014).  
 176 Consistent with this function, DUF1220 domains are highly expressed in the cell  
 177 bodies and dendrites of adult neurons (Popesco et al., 2006). A role for DUF1220  
 178 domains in synaptogenesis could potentially explain the association with ASD  
 179 severity (Davis et al., 2014). ASDs are associated with abnormalities in cortical  
 180 minicolumns (Casanova et al., 2002) and cortical white matter (Hazlett et al., 2005;  
 181 Courchesne et al., 2011), both of which suggest a disruption of normal neuronal  
 182 maturation (Courchesne and Pierce, 2005; Minshew and Williams, 2007).

183 Alternatively, NBPf genes are also known to interact with NF- $\kappa$ B (Zhou et al.,  
 184 2013), a transcription factor implicated in tumor progression, with a range of roles  
 185 including apoptosis and inflammation (Karin and Lin, 2002; Perkins, 2012). Postnatal  
 186 apoptosis has a significant influence on brain growth (Kuan et al., 2000; Polster et al.,  
 187 2003; Madden et al., 2007), including regulating neuronal density (Sanno et al.,  
 188 2010), and apoptotic genes may have been targeted by selection in relation to primate  
 189 brain expansion (Vallender and Lahn, 2006). Disruption of apoptosis causes  
 190 microcephaly (Poulton et al., 2011), potentially explaining the association between  
 191 DUF1220 dosage and head circumference (Dumas et al., 2012). The association of  
 192 NF- $\kappa$ B with inflammatory diseases (Tak et al., 2001) is also intriguing, given the  
 193 growing evidence that the inflammatory response is linked to the risk and severity of  
 194 ASD (Meyer et al., 2011; Depino, 2012).

195 If DUF1220 domain number does contribute to the evolution of postnatal  
 196 brain growth, this contrasts with results of previously studied candidate genes with  
 197 known roles in neurogenesis that co-evolve with prenatal brain growth (Montgomery  
 198 et al., 2011). This suggests a two-component model of brain evolution where selection  
 199 targets one set of genes to bring about an increase in neuron number (e.g.  
 200 Montgomery et al., 2011; Montgomery and Mundy, 2012a;b), and an independent set  
 201 of genes to optimize neurite growth and connectivity (e.g. Charrier et al., 2012).  
 202 NBPf genes may fall into the latter category. This two-component model is consistent  
 203 with comparative analyses that indicate pre- and postnatal brain development evolve

independently, and must therefore be relatively free of reciprocal pleiotropic effects (Barton and Capellini, 2011).

Finally, these results add further evidence that many of the genetic changes that contribute to human evolution will be based on the continuation or exaggeration of conserved gene-phenotype associations that contribute to primate brain evolution (Montgomery et al., 2011; Scally et al., 2012). Understanding the commonalities between human and non-human primate brain evolution is therefore essential to understand the genetic differences that contribute the derived aspects of human evolution.

## Materials and methods

### *Counting DUF1220 domains*

HMMER3.1b (Eddy, 2011) was used to build a Hidden Markov Model (HMM) from the DUF1220 (PF06758) seed alignment stored in the PFAM database (Finn et al., 2014). The longest isoforms for all proteomes of 12 primate genomes from Ensembl v.78 (Cunningham et al., 2014) (Figure 1A), were searched using the protein DUF1220 HMM (hmmsearch, E-value < 1e-10) (Table S1). We extracted the corresponding cDNA regions to build a DUF1220 nucleotide profile HMM (nHMM), allowing for more sensitive analysis across a broad phylogenetic range. The DUF1220 nHMM was used to search the complete genomic DNA for all 12 species. These counts were filtered to remove any DUF1220 domains not located in annotated exonic sequence, or located in known pseudogenes.

We next filtered our counts to limit them to exonic sequence in close proximity to the NBPF-specific Conserved-Mammal (CM) promoter (O’Bleness et al. 2012). To do so, we built a nucleotide HMM for the CM promoter based on a MAFFT (Kato et al., 2002) alignment of the 900bp CM region upstream of human genes NBPF4, NBPF6 and NBPF7. Using this CM promoter nHMM, we searched 1000bp up- and downstream of genes containing DUF1220 domains for significant CM promoter hits (nhmmer, E-value < 1e-10). This provided final counts for DUF1220 domains within exonic regions and associated with the CM promoter (Table 1). These counts were used in subsequent phylogenetic analyses. In the Supplementary Information we compare our counts with previous estimates and discuss possible sources of error. All scripts and data used in the analysis are freely available from: <https://github.com/qfma/duf1220>

238

### 239 ***Phylogenetic gene-phenotype analysis***

240 Phylogenetic multivariate generalized mixed models were implemented using a  
 241 Bayesian approach in MCMCglmm (Hadfield, 2010), to test for phylogenetically-  
 242 corrected associations between DUF1220 counts and *log*-transformed phenotypic data  
 243 (Table S2). All analyses were performed using a Poisson distribution, as  
 244 recommended for count data (O’Hara and Kotze, 2010), with uninformative,  
 245 parameter expanded priors for the random effect (G:  $V = 1, n \nu = 1, \alpha.\nu = 0,$   
 246  $\alpha.V = 1000$ ; R:  $V = 1, \nu = 0.002$ ) and default priors for the fixed effects.  
 247 Phylogenetic relationships were taken from the 10k Trees project (Arnold et al.,  
 248 2010). We report the posterior mean of the co-factor included in each model and its  
 249 95% confidence intervals (CI), and the probability that the parameter value is  $>0$   
 250 ( $p_{MCMC}$ ) as we specifically hypothesize a positive association (Dumas et al., 2012).  
 251 Alternative data treatments lead to similar conclusions (Supplementary Information).

252

### 253 **Acknowledgments and funding information**

254 We thank James Sikela, Majesta O’Bleness, Chris Venditti, Charlotte Montgomery,  
 255 Andrew Moore and Jarrod Hadfield for advice and comments, and Judith Mank’s lab  
 256 at UCL for support. SHM thanks the Leverhulme Trust for funding.

257

### 258 **References**

- 259 Arnold C, Matthews LJ, Nunn CL. 2010. The 10kTrees website: A new online  
 260 resource for primate phylogeny. *Evol Anthropol* 19:114–118.
- 261 Barton RA, Capellini I. 2011. Maternal investment, life histories, and the costs of  
 262 brain growth in mammals. *Proc Natl Acad Sci USA* 108:6169–6174.
- 263 Barton RA, Harvey PH. 2000. Mosaic evolution of brain structure in mammals.  
 264 *Nature* 405:1055–8.
- 265 Barton RA, Venditti C. 2014. Report Rapid Evolution of the cerebellum in humans  
 266 and other great apes. *Curr Biol* 24:2440–2444.
- 267 Bhardwaj RD, Curtis MA, Spalding KL, Buchholz BA, Fink D, Björk-Eriksson T,  
 268 Nordborg C, Gage FH, Druid H, Eriksson PS, Frisén J. 2006. Neocortical  
 269 neurogenesis in humans is restricted to development. *Proc Natl Acad Sci USA*  
 270 103:12564–12568.



- 271 Bond J, Roberts E, Springell K, Lizarraga SB, Scott S, Higgins J, Hampshire DJ,  
272 Morrison EE, Leal GF, Silva EO, Costa SMR, Baralle D, Raponi M, Karbani G,  
273 Rashid Y, Jafri H, Bennett C, Corry P, Walsh CA, Woods CG. 2005. A  
274 centrosomal mechanism involving *CDK5RAP2* and *CENPJ* controls brain size.  
275 Nat Genet 37:353–355.
- 276 Buchman JJ, Tseng HC, Zhou Y, Frank CL, Xie Z, Tsai LH. 2010. *CDK5RAP2*  
277 interacts with pericentrin to maintain the neural progenitor pool in the  
278 developing neocortex. Neuron 66:386–402.
- 279 Casanova MF, Buxhoeveden DP, Cohen M, Switala AE, Roy EL. 2002.  
280 Minicolumnar pathology in dyslexia. Ann Neurol 52:108–110.
- 281 Charrier C, Joshi K, Coutinho-Budd J, Kim JE, Lambert N, De Marchena J, Jin WL,  
282 Vanderhaeghen P, Ghosh A, Sassa T, Polleux F. 2012. Inhibition of *SRGAP2*  
283 function by its human-specific paralogs induces neoteny during spine  
284 maturation. Cell 149:923–935.
- 285 Conde C, Cáceres A. 2009. Microtubule assembly, organization and dynamics in  
286 axons and dendrites. Nat Rev Neurosci 10:319–332.
- 287 Courchesne E, Karns C, Davis H, Ziccardi R, Carper R, Tigue Z, Chisum HJ, Moses  
288 P, Pierce K, Lord C, Lincoln A, Pizzo S, Schreibman L, Haas R, Akshoomoff N,  
289 Courchesne R. 2011. Unusual brain growth patterns in early life in patients with  
290 autistic disorder: An MRI study. Neurology 76:2111.
- 291 Courchesne E, Pierce K. 2005. Why the frontal cortex in autism might be talking only  
292 to itself: Local over-connectivity but long-distance disconnection. Curr Opin  
293 Neurobiol 15:225–230.
- 294 Cunningham F, Amode MR, Barrell D, Beal K, Billis K, Brent S, Carvalho-Silva D,  
295 Clapham P, Coates G, Fitzgerald S, et al. 2014. Ensembl 2015. Nucleic Acids  
296 Res 43:D662–D669.
- 297 Davis JM, Searles VB, Anderson N, Keeney J, Dumas L, Sikela JM. 2014. DUF1220  
298 Dosage is linearly associated with increasing severity of the three primary  
299 symptoms of autism. PLoS Genet 10:1–5.
- 300 Depino AM. 2012. Peripheral and central inflammation in autism spectrum disorders.  
301 Mol Cell Neurosci 53:69–76.
- 302 Dumas L, Sikela JM. 2009. DUF1220 domains, cognitive disease, and human brain  
303 evolution. Cold Spring Harb Symp Quant Biol 74:375–382.
- 304 Dumas LJ, O’Bleness MS, Davis JM, Dickens CM, Anderson N, Keeney JG, Jackson  
305 J, Sikela M, Raznahan A, Giedd J, Rapoport J, Nagamani SSC, Erez A, Brunetti-  
306 Pierri N, Sugalski R, Lupski JR, Fingerlin T, Cheung SW, Sikela JM. 2012.  
307 DUF1220-domain copy number implicated in human brain-size pathology and  
308 evolution. Am J Hum Genet 91:444–454.

- 309 Eddy SR. 2011. Accelerated profile HMM searches. *PLoS Comput Biol* 7.
- 310 Felsenstein J. 1985. Phylogenies and the Comparative Method. *Am Nat* 125:1–5.
- 311 Hadfield JD. 2010. MCMC methods for multi-response generalized linear mixed  
312 models: The MCMCglmm R package. *J Stat Softw* 33:1–22.
- 313 Hazlett HC, Poe M, Gerig G, Smith RG, Provenzale J, Ross A, Gilmore J, Piven J.  
314 2005. Magnetic resonance imaging and head circumference study of brain size in  
315 autism: birth through age 2 years. *Arch Gen Psychiatry* 62:1366–1376.
- 316 Inestrosa NC, Varela-Nallar L. 2014. Wnt signalling in neuronal differentiation and  
317 development. *Cell Tissue Res* 359:215–223.
- 318 Karin M, Lin A. 2002. NF-κB at the crossroads of life and death. *Nat Immunol*  
319 3:221–227.
- 320 Katoh K, Misawa K, Kuma K, Miyata T. 2002. MAFFT: a novel method for rapid  
321 multiple sequence alignment based on fast Fourier transform. *Nucleic Acids Res*  
322 30:3059–3066.
- 323 Keeney J, Dumas L, Sikela J. 2014a. The case for DUF1220 domain dosage as a  
324 primary contributor to anthropoid brain expansion. *Front Hum Neurosci* 8:1–11.
- 325 Keeney JG, Davis JM, Siegenthaler J, Post MD, Nielsen BS, Hopkins WD, Sikela  
326 JM. 2014b. DUF1220 protein domains drive proliferation in human neural stem  
327 cells and are associated with increased cortical volume in anthropoid primates.  
328 *Brain Struct Funct* 1-8.
- 329 Keeney JG, O’Bleness MS, Anderson N, Davis JM, Arevalo N, Busquet N, Chick W,  
330 Rozman J, Hölter SM, Garrett L, Horsch M, Beckers J, Wurst W, Klingenspor  
331 M, Restrepo D, de Angelis MH, Sikela JM. 2014c. Generation of mice lacking  
332 DUF1220protein domains: effects on fecundity and hyperactivity. *Mamm*  
333 *Genome* 26:33–42.
- 334 Kuan CY, Roth KA, Flavell RA, Rakic P. 2000. Mechanisms of programmed cell  
335 death in the developing brain. *Trends Neurosci* 23:291–297.
- 336 Madden SD, Donovan M, Cotter TG. 2007. Key apoptosis regulating proteins are  
337 down-regulated during postnatal tissue development. *Int J Dev Biol* 51:415–425.
- 338 Meyer U, Feldon J, Dammann O. 2011. Schizophrenia and autism: both shared and  
339 disorder-specific pathogenesis via perinatal inflammation? *Pediatr Res* 69:26–33.
- 340 Minshew NJ, Williams DL. 2007. The new neurobiology of autism. *Arch Neurol*  
341 64:945–950.
- 342 Montgomery SH, Capellini I, Venditti C, Barton RA, Mundy NI. 2011. Adaptive  
343 evolution of four microcephaly genes and the evolution of brain size in  
344 anthropoid primates. *Mol Biol Evol* 28:625–638.

- 345 Montgomery SH, Mundy NI. 2012a. Evolution of *ASPM* is associated with both  
346 increases and decreases in brain size in primates. *Evolution* 66:927–32.
- 347 Montgomery SH, Mundy NI. 2012b. Positive selection on *NIN*, a gene involved in  
348 neurogenesis, and primate brain evolution. *Genes, Brain Behav* 11:903–910.
- 349 O’Bleness M, Searles VB, Dickens CM, Astling D, Albracht D, Mak ACY, Lai YYY,  
350 Lin C, Chu C, Graves T, Kwok P-Y, Wilson RK, Sikela JM. 2014. Finished  
351 sequence and assembly of the DUF1220-rich 1q21 region using a haploid human  
352 genome. *BMC Genomics* 15:387.
- 353 O’Bleness MS, Dickens CM, Dumas LJ, Kehrer-Sawatzki H, Wyckoff GJ, Sikela JM.  
354 2012. Evolutionary history and genome organization of DUF1220 protein  
355 domains. *G3 (Bethesda)* 2:977–86.
- 356 O’Hara RB, Kotze DJ. 2010. Do not log-transform count data. *Methods Ecol Evol*  
357 1:118–122.
- 358 Perkins ND. 2012. The diverse and complex roles of NF-κB subunits in cancer. *Nat*  
359 *Rev Cancer* 12(2): 121-132.
- 360 Polster BM, Robertson CL, Bucci CJ, Suzuki M, Fiskum G. 2003. Postnatal brain  
361 development and neural cell differentiation modulate mitochondrial Bax and  
362 BH3 peptide-induced cytochrome c release. *Cell Death Differ* 10:365–370.
- 363 Popesco MC, Maclaren EJ, Hopkins J, Dumas L, Cox M, Meltesen L, McGavran L,  
364 Wyckoff GJ, Sikela JM. 2006. Human lineage-specific amplification, selection,  
365 and neuronal expression of DUF1220 domains. *Science* 313:1304–1307.
- 366 Poulton CJ, Schot R, Kia SK, Jones M, Verheijen FW, Venselaar H, De Wit MCY,  
367 De Graaff E, Bertoli-Avella AM, Mancini GMS. 2011. Microcephaly with  
368 simplified gyration, epilepsy, and infantile diabetes linked to inappropriate  
369 apoptosis of neural progenitors. *Am J Hum Genet* 89:265–276.
- 370 Roubin R, Acquaviva C, Chevrier V, Sedjāi F, Zyss D, Birnbaum D, Rosnet O. 2013.  
371 Myomegalin is necessary for the formation of centrosomal and Golgi-derived  
372 microtubules. *Biol Open* 2:238–50.
- 373 Sanno H, Shen X, Kuru N, Bormuth I, Bobsin K, Gardner H a R, Komljenovic D,  
374 Tarabykin V, Erzurumlu RS, Tucker KL. 2010. Control of postnatal apoptosis in  
375 the neocortex by RhoA-subfamily GTPases determines neuronal density. *J*  
376 *Neurosci* 30:4221–4231.
- 377 Scally A, Dutheil JY, Hillier LW, Jordan GE, Goodhead I, Herrero J, Hobolth A,  
378 Lappalainen T, Mailund T, Marques-Bonet T, et al. 2012. Insights into hominid  
379 evolution from the gorilla genome sequence. *Nature* 483:169–175.
- 380 Tak PP, Firestein GS, Tak PP, Firestein GS. 2001. NF-κB: a key role in inflammatory  
381 diseases. *J Clin Invest* 107:7–11.

- 382 Thornton GK, Woods CG. 2009. Primary microcephaly: do all roads lead to Rome?  
383 Trends Genet 25:501–510.
- 384 Vallender EJ, Lahn BT. 2006. A primate-specific acceleration in the evolution of the  
385 caspase-dependent apoptosis pathway. Hum Mol Genet 15:3034–3040.
- 386 Vandepoele K, Andries V, Van Roy N, Staes K, Vandesompele J, Laureys G, De  
387 Smet E, Berx G, Speleman F, van Roy F. 2008. A constitutional translocation  
388 t(1;17)(p36.2;q11.2) in a neuroblastoma patient disrupts the human *NBPF1* and  
389 *ACCN1* genes. PLoS One 3(5), e2207.
- 390 Vandepoele K, Van Roy N, Staes K, Speleman F, Van Roy F. 2005. A novel gene  
391 family NBPF: Intricate structure generated by gene duplications during primate  
392 evolution. Mol Biol Evol 22:2265–2274.
- 393 Vandepoele K, Staes K, Andries V, van Roy F. 2010. Chibby interacts with NBPF1  
394 and clusterin, two candidate tumor suppressors linked to neuroblastoma. Exp  
395 Cell Res 316:1225–1233.
- 396 Zhou F, Xing Y, Xu X, Yang Y, Zhang J, Ma Z, Wang J. 2013. NBPF is a potential  
397 DNA-binding transcription factor that is directly regulated by NF- $\kappa$ B. Int J  
398 Biochem Cell Biol 45:2479–2490.

399

400

401

402

403

404

405

406

407

408

409

410

411

412

413

414

415

416

417 **Tables**

418

419 **Table 1:** DUF1220 count data

| Species                    | O'Bleness et al.<br>(2012) | nHMM            |                                       |
|----------------------------|----------------------------|-----------------|---------------------------------------|
|                            |                            | whole<br>genome | functional exonic<br>with CM promoter |
| <i>Homo sapiens</i>        | 272                        | 302             | 262                                   |
| <i>Pan troglodytes</i>     | 125                        | 138             | 34                                    |
| <i>Gorilla gorilla</i>     | 99                         | 97              | 32                                    |
| <i>Pongo abelii</i>        | 92                         | 101             | 27                                    |
| <i>Nomascus leucogenys</i> | 53                         | 59              | 6                                     |
| <i>Papio anubis</i>        | -                          | 75              | 15                                    |
| <i>Chlorocebus sabaeus</i> | -                          | 48              | 16                                    |
| <i>Macaca mulatta</i>      | 35                         | 74              | 10                                    |
| <i>Callithrix jacchus</i>  | 31                         | 75              | 9                                     |
| <i>Tarsius syrichta</i>    | -                          | 47              | 2                                     |
| <i>Microcebus murinus</i>  | 2                          | 4               | 1                                     |
| <i>Otolemur garnettii</i>  | 3                          | 4               | 1                                     |

420

421

422

423

424

425

426

427

428

429

430

431

432

433

434

435

436

437

438

439

**Table 2: MCMCglmm results of multivariate models**

**a) Brain mass and body mass**

| Model              | Posterior mean | 95% CI          | pMCMC |
|--------------------|----------------|-----------------|-------|
| 1. log(brain mass) | 4.105          | 2.163 - 6.000   | 0.001 |
| + log(body mass)   | -1.986         | -3.544 - -3.900 | 0.988 |

**b) Prenatal and postnatal growth**

| Model                          | Posterior mean | 95% CI          | pMCMC  |
|--------------------------------|----------------|-----------------|--------|
| 1. log(prenatal brain growth)  | -2.158         | -4.471 - 0.106  | 0.967  |
| + log(postnatal brain growth)  | 3.319          | 1.470 - 4.982   | 0.002  |
| 2. log(postnatal brain growth) | 2.910          | 1.641 - 4.151   | <0.001 |
| + log(postnatal body growth)   | -1.241         | -2.442 - -0.052 | 0.977  |

**c) Brain regions**

| Model                     | Posterior mean | 95% CI           | pMCMC |
|---------------------------|----------------|------------------|-------|
| 1. log(neocortex volume)  | 5.961          | 0.720 - 11.173   | 0.014 |
| + log(RoB volume)         | -5.817         | -13.322 - 1.120  | 0.953 |
| 2. log(cerebellum volume) | 3.699          | -5.857 - 12.611  | 0.186 |
| + log(RoB volume)         | -2.435         | -13.869 - 10.132 | 0.681 |
| 3. log(neocortex volume)  | 6.076          | -0.139 - 12.5712 | 0.025 |
| + log(cerebellum volume)  | -0.369         | -9.5128 - 8.961  | 0.526 |
| + log(RoB volume)         | -5.494         | -15.814 - 5.288  | 0.872 |

# Figures

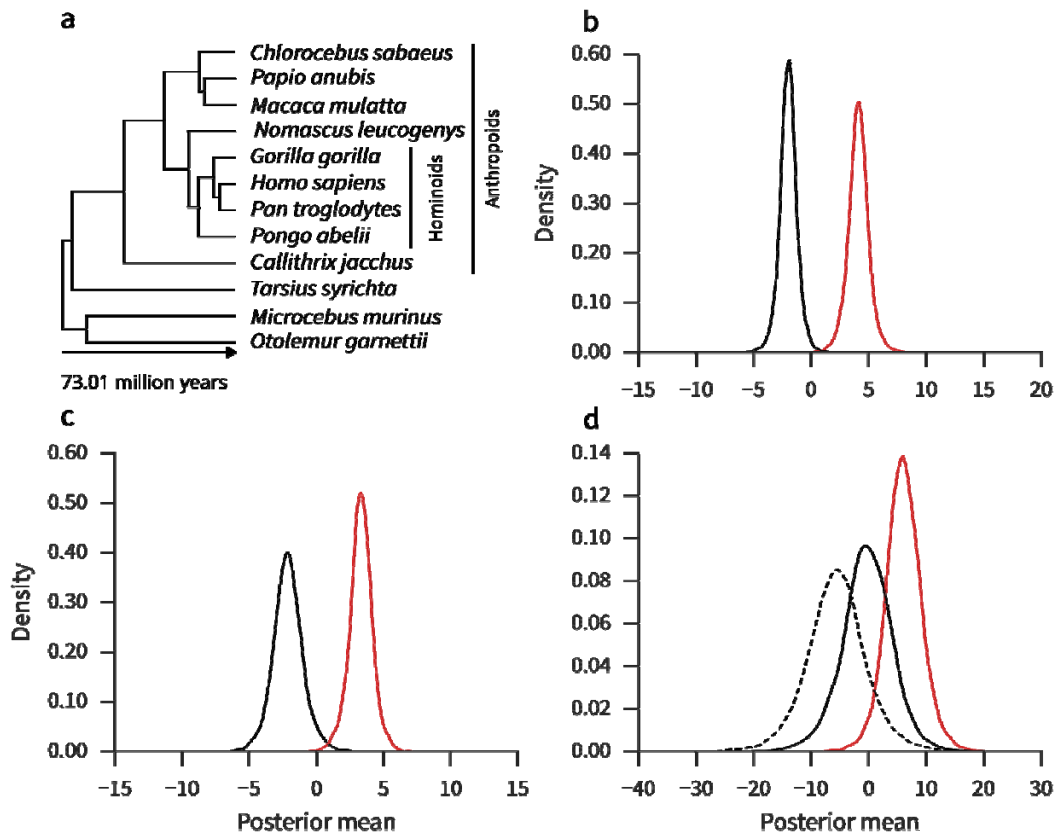

**Figure 1:** A) Phylogeny of Ensembl primates. B) Posterior means of the association between DUF1220 count and brain mass (red) and body mass (black). C) Posterior means of the association between DUF1220 count and postnatal brain growth (red) and prenatal brain growth (black). D) Posterior means of the association between DUF1220 count and neocortex volume (red), cerebellum volume (solid black) and rest-of-brain volume (dashed black).
